# Supplementary material
Source: PubMed Central journal article supplement (PMC3142939)

# Supporting Information

## A Vaccine Strategy that Induces Protective Immunity Against Heroin

G. Neil Stowe, Leandro F. Vendruscolo, Scott Edwards, Joel E. Schlosburg, Kaushik K. Misra, Gery Schulteis, Alexander V. Mayorov, Joseph S. Zakhari, George F. Koob, Kim D. Janda

| <b><u>INDEX</u></b>             | <b><u>PAGE</u></b> |
|---------------------------------|--------------------|
| Compound 6 <sup>1</sup> H NMR   | S2                 |
| Compound 6 <sup>13</sup> C NMR  | S3                 |
| Compound 9 <sup>1</sup> H NMR   | S4                 |
| Compound 9 <sup>13</sup> C NMR  | S5                 |
| Compound 10 <sup>1</sup> H NMR  | S6                 |
| Compound 10 <sup>13</sup> C NMR | S7                 |
| Compound 6 HPLC                 | S8                 |
| Compound 9 HPLC                 | S9                 |
| Compound 10 HPLC                | S10                |

NSII-32A  
DQF-COSY (States-TPII) using Gradient Pulse, DRX-500, BBO Probe

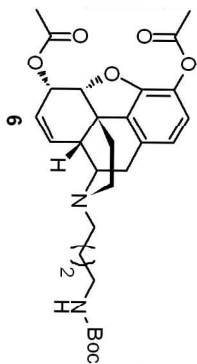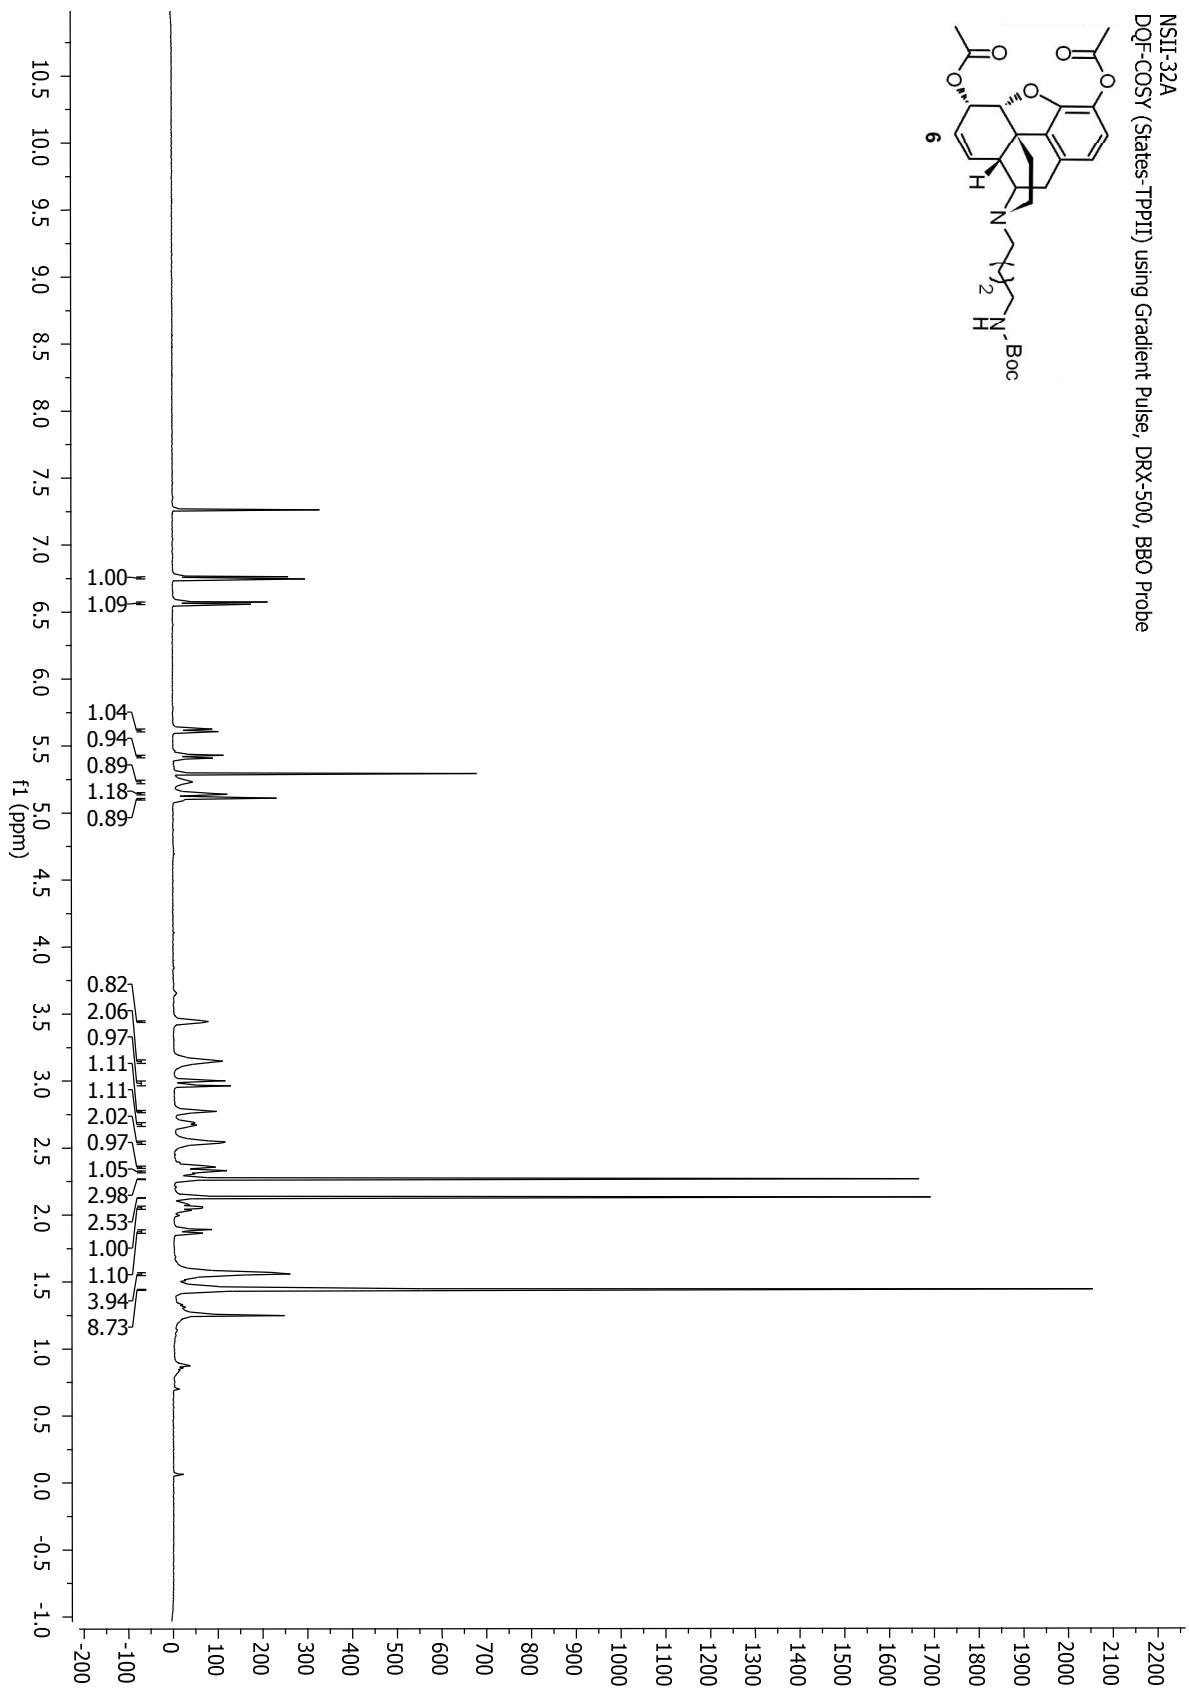

NSI-158B  
C-13 Routine ID, DCH CryoProbe, 10-26-2006

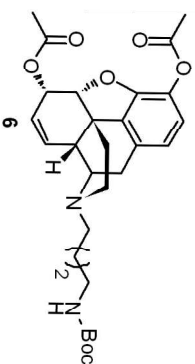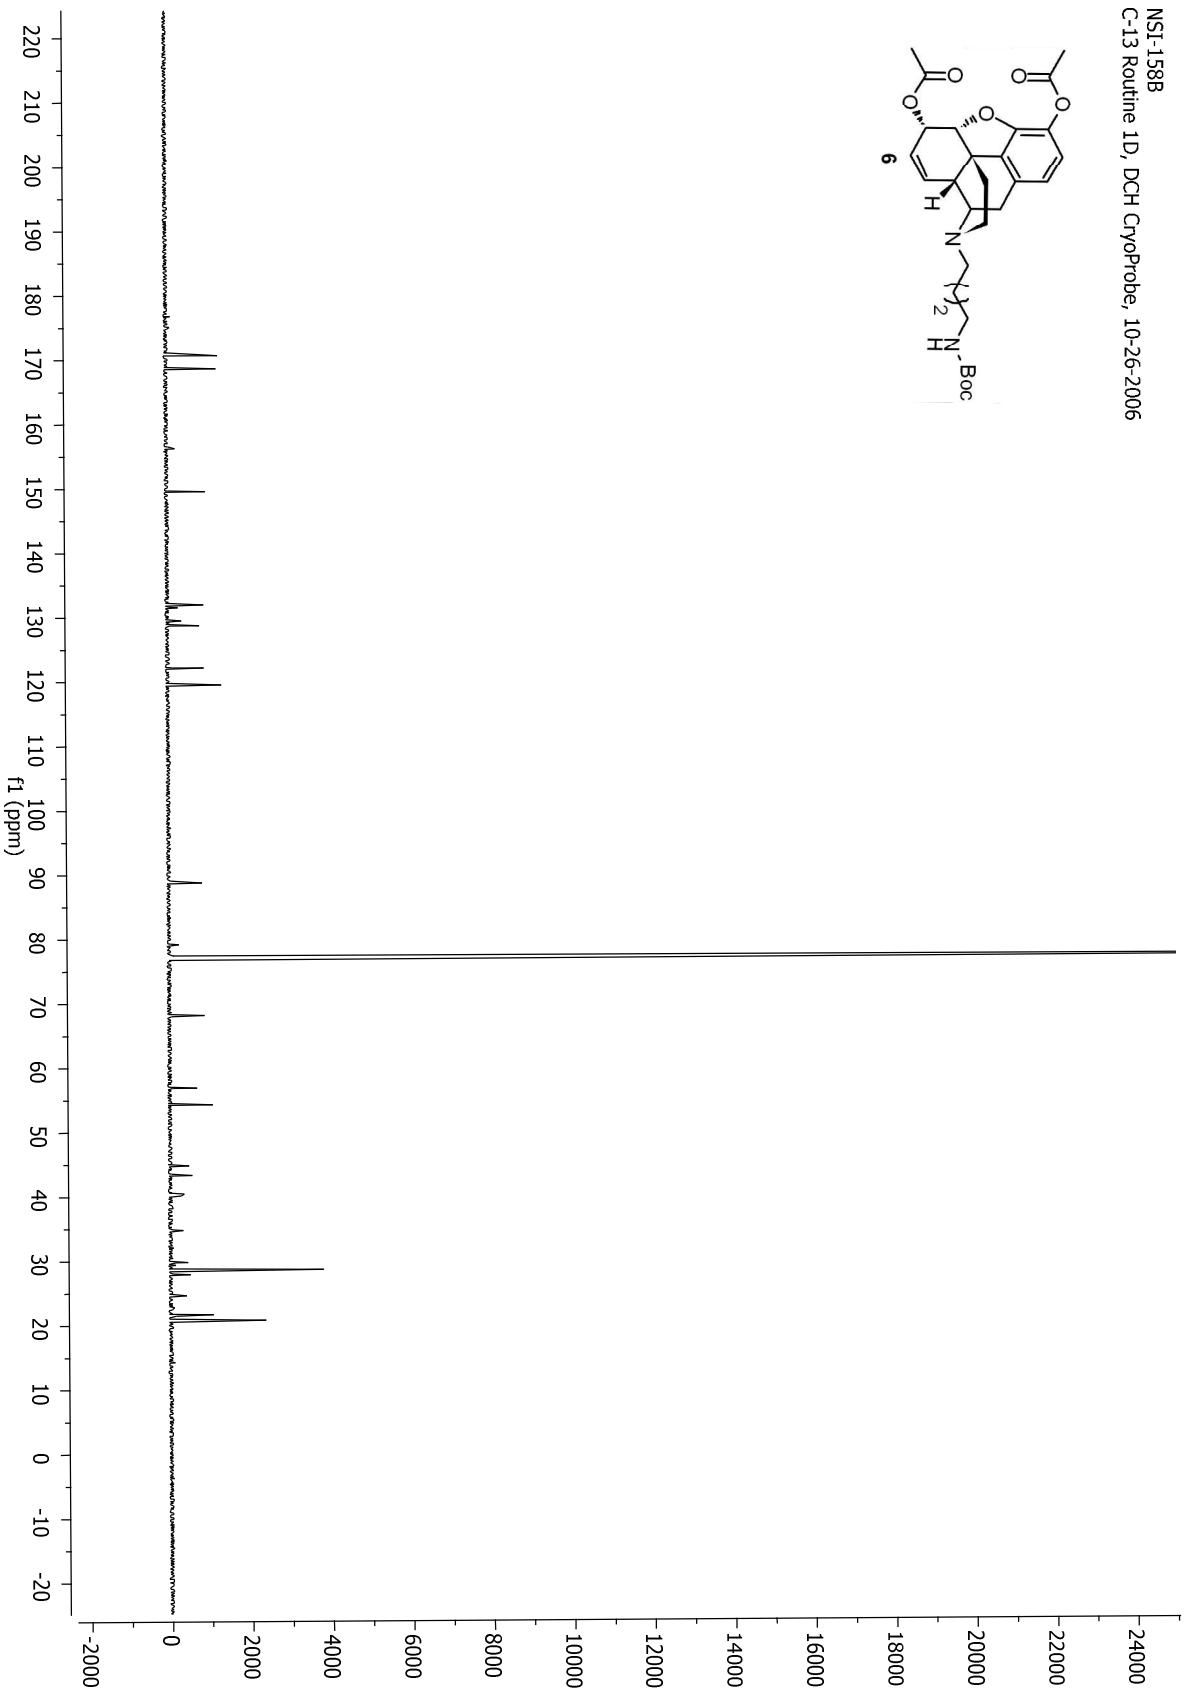

NSII-44A  
DQF-COSY (States-TPII) using Gradient Pulse, DRX-500, BBO Probe

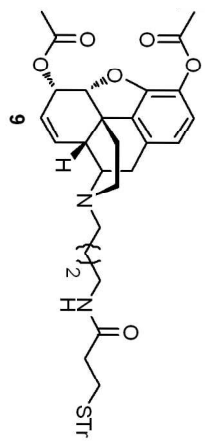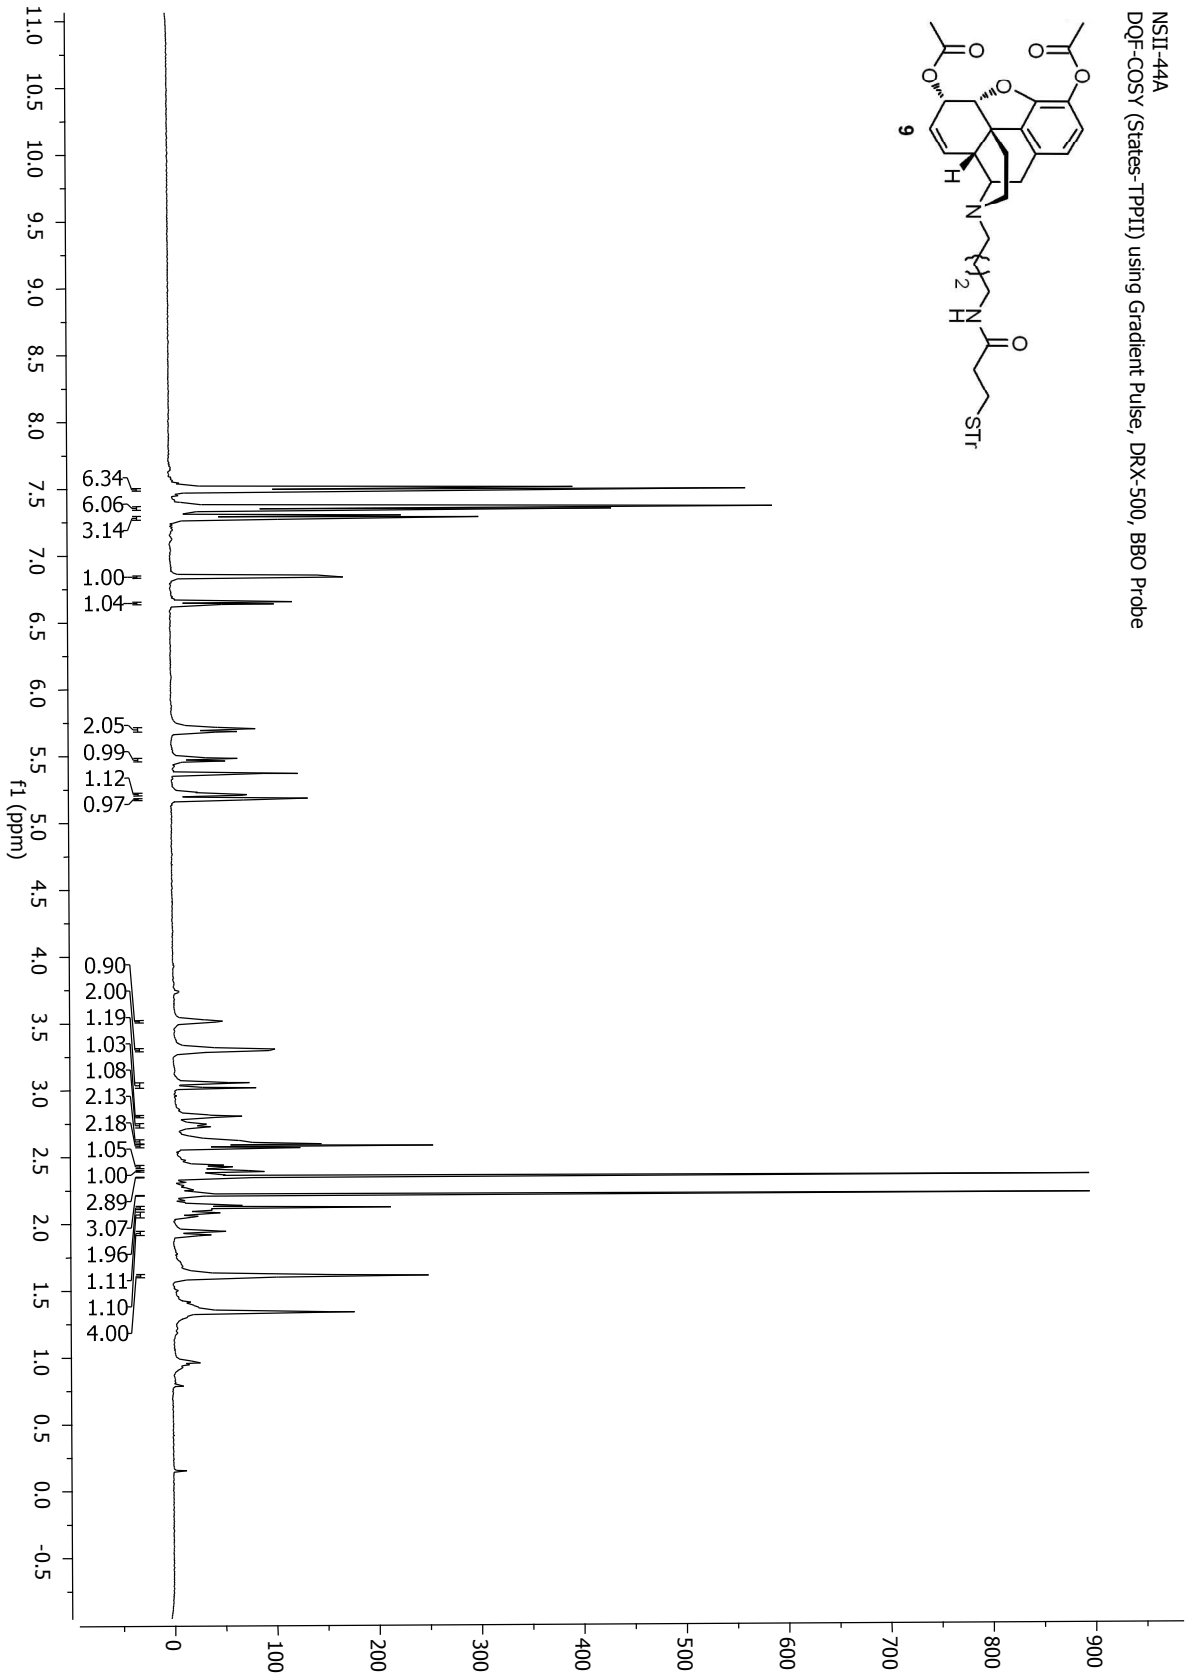

NSII-44B  
C-13-APT, BBO Probe, DRX-500, using deptq-135 pulse, 5-2-05

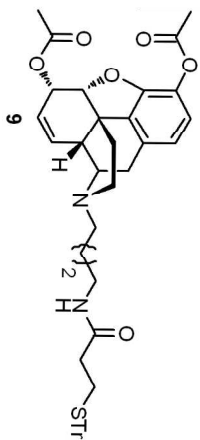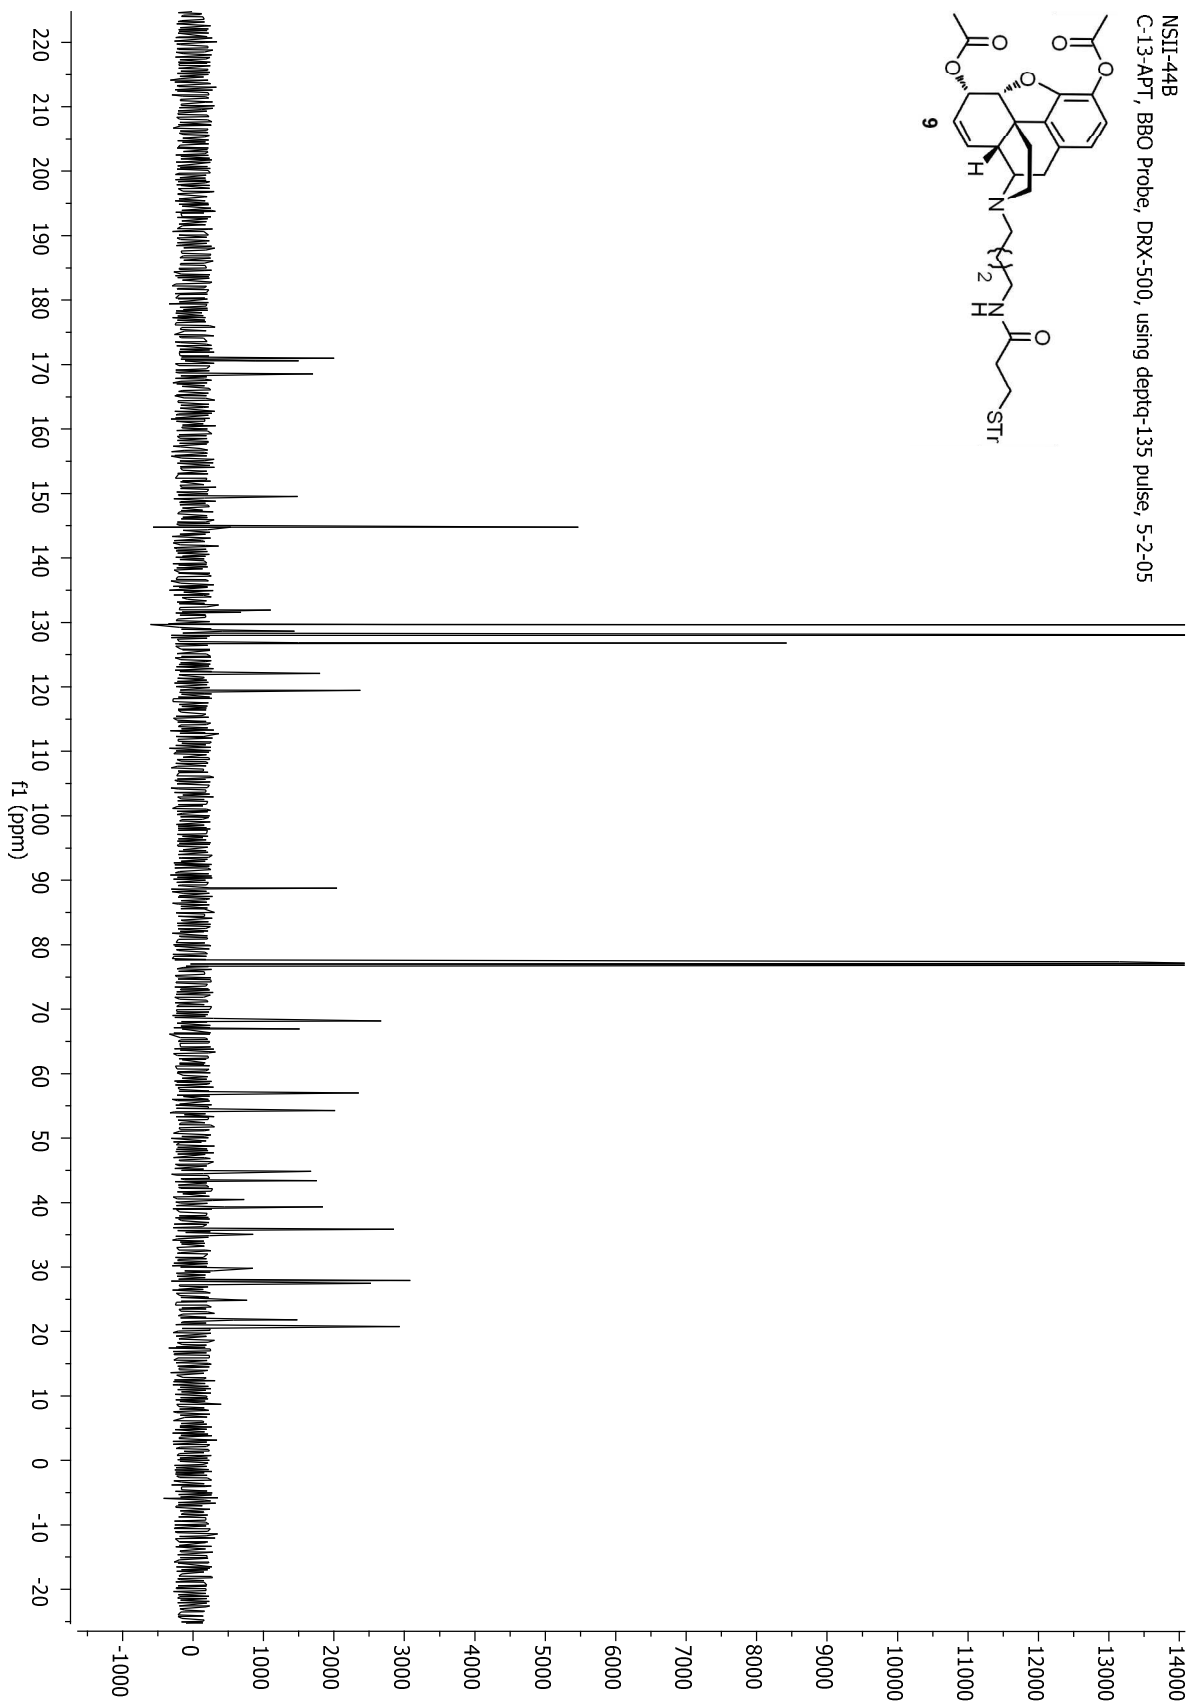

NSII-225  
DQF-COSY (States-TPPII) using Gradient Pulse, DRX-500, BBO Probe

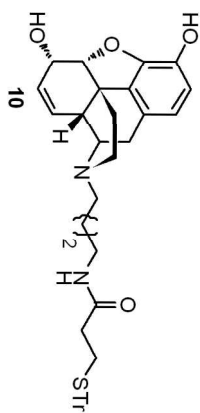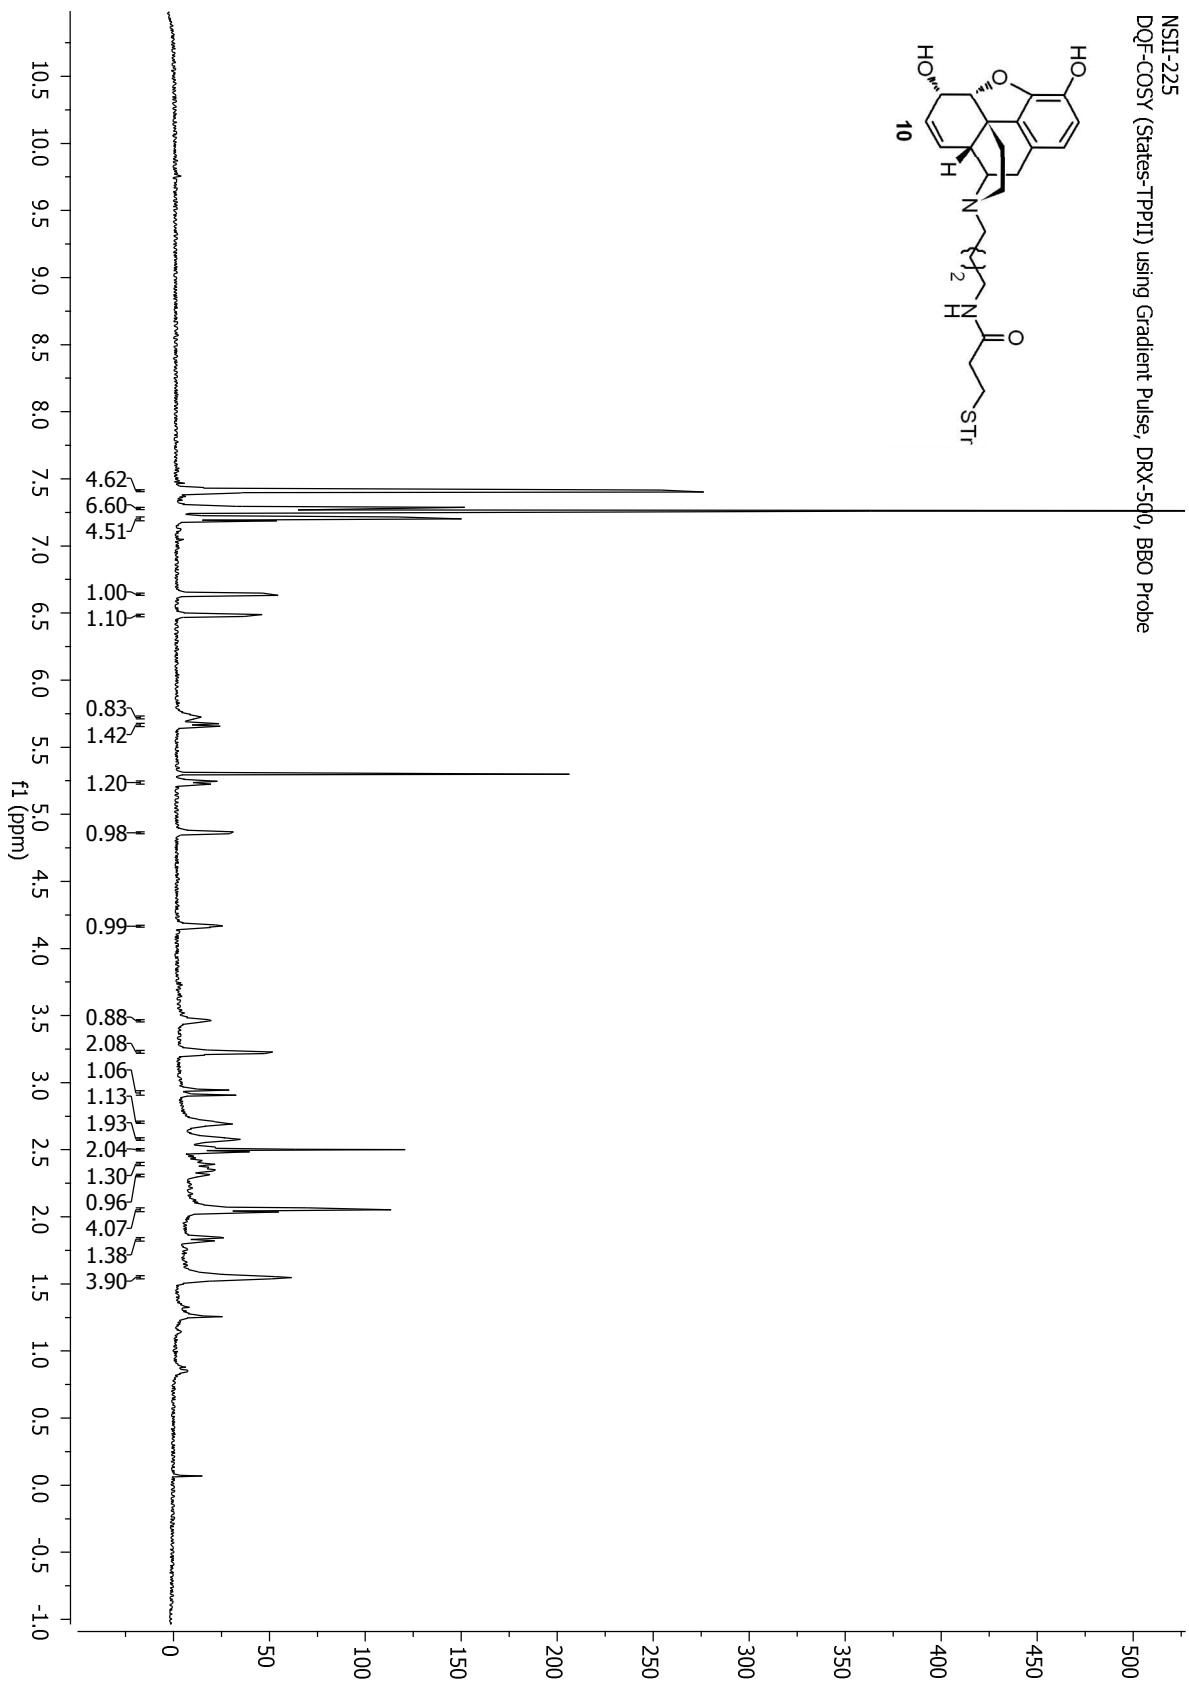

NSI-167D  
C-13 Routine 1D, DCH CryoProbe, 10-26-2006

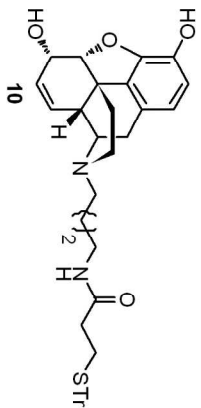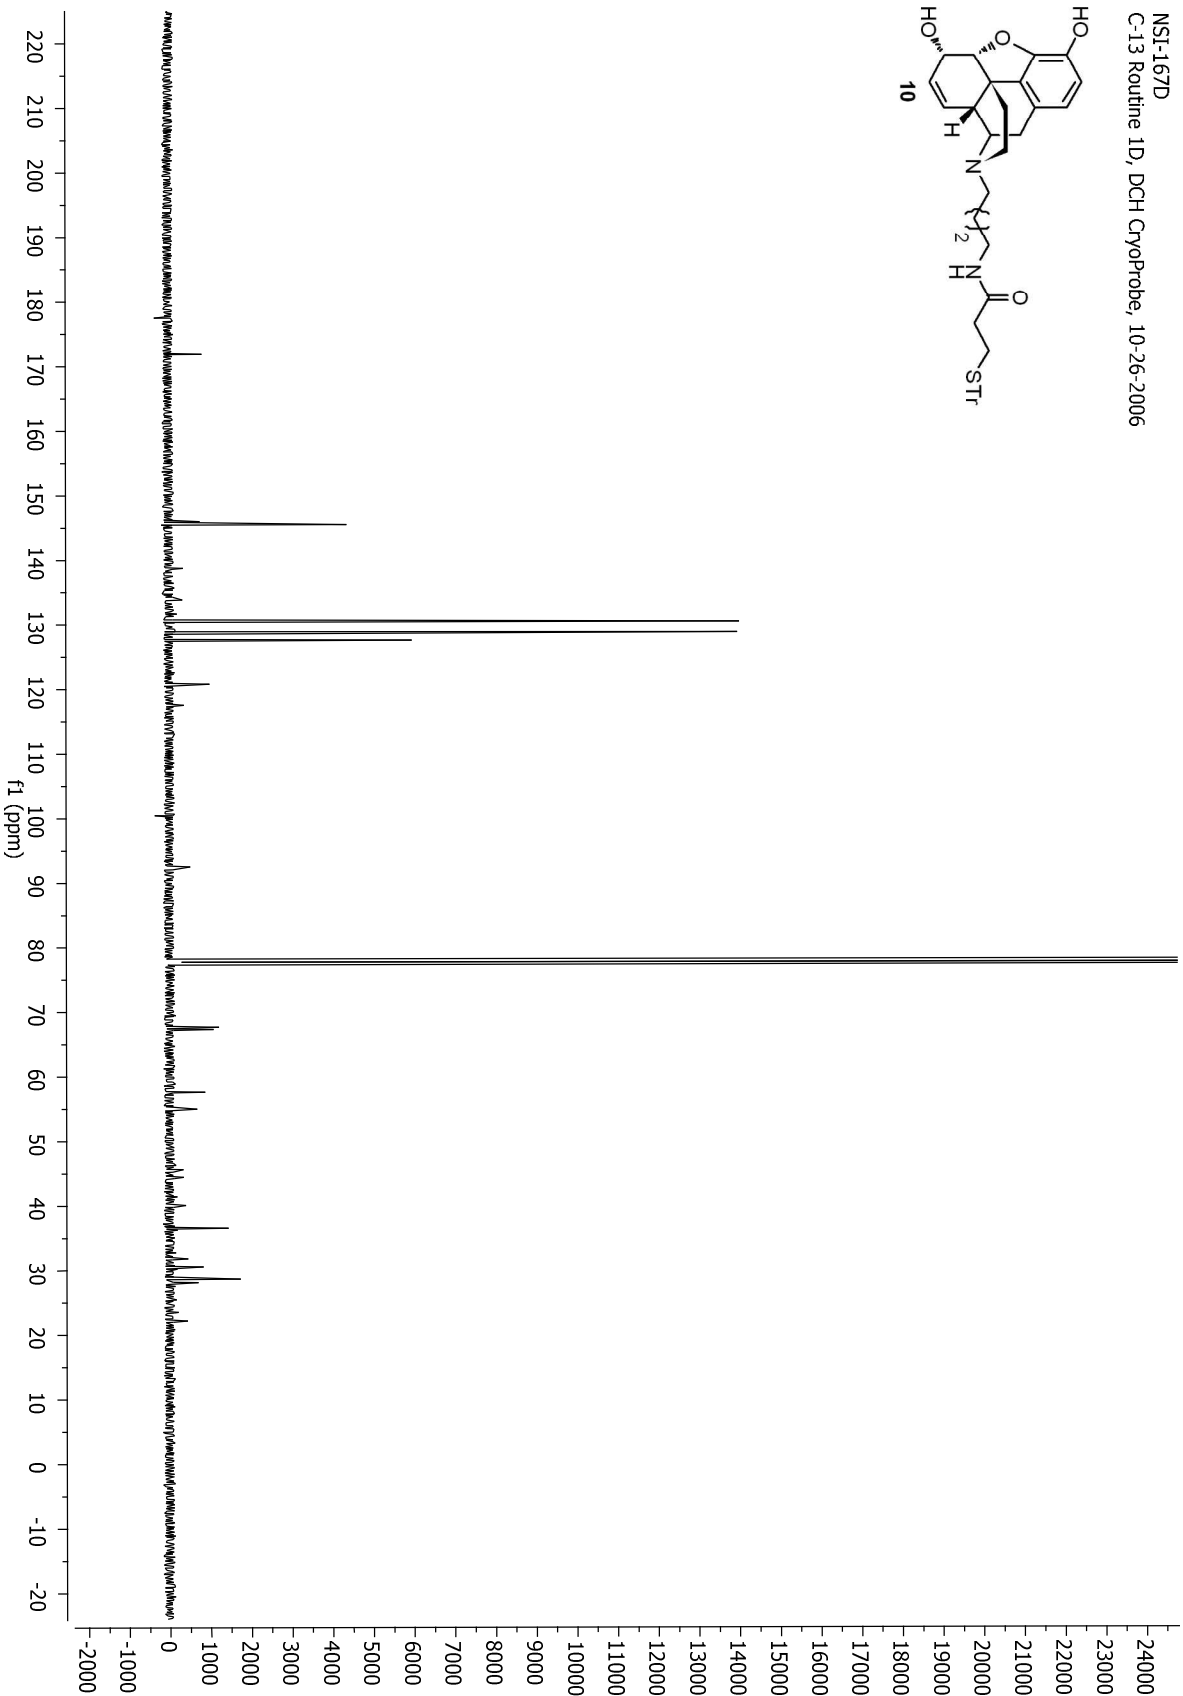

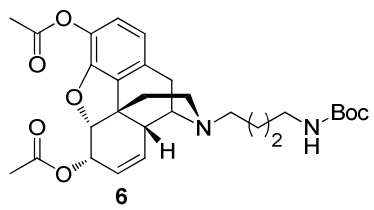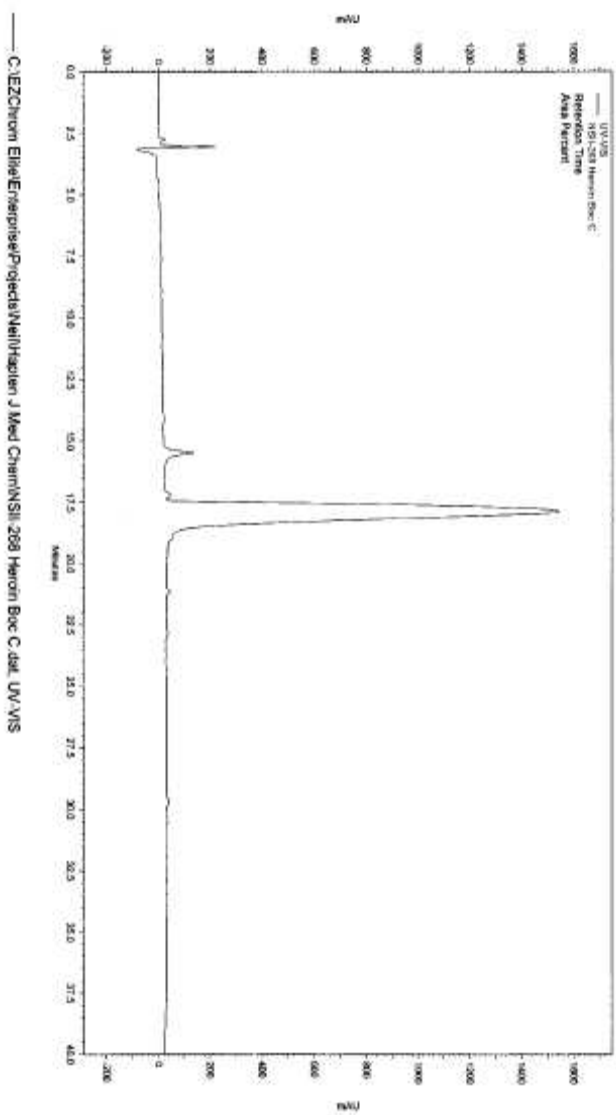



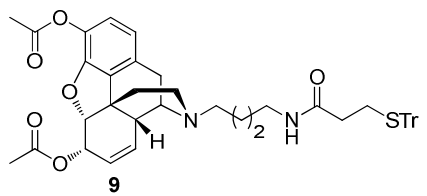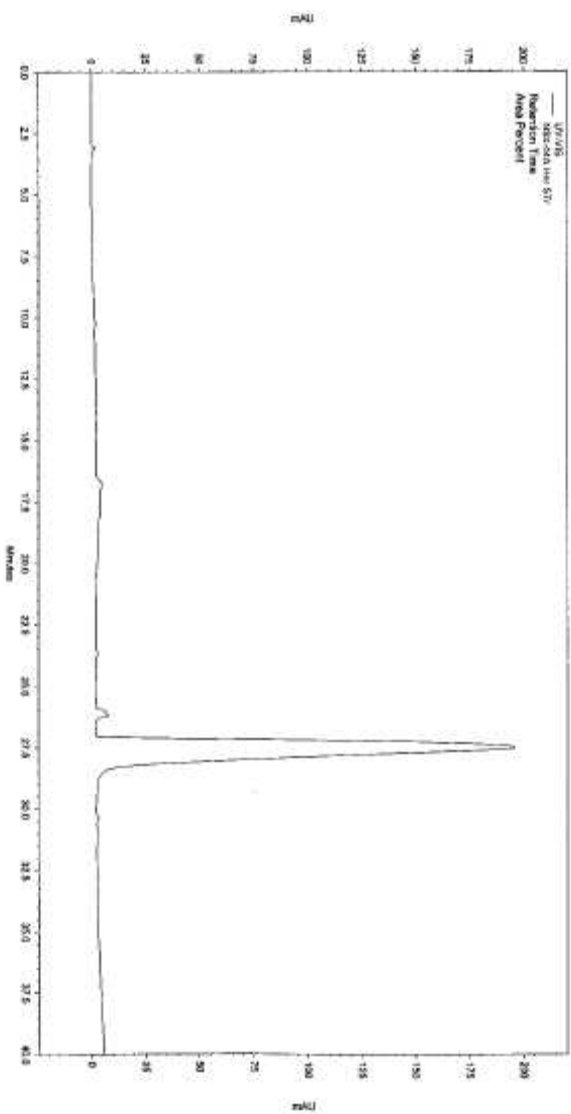

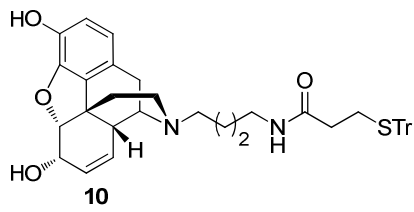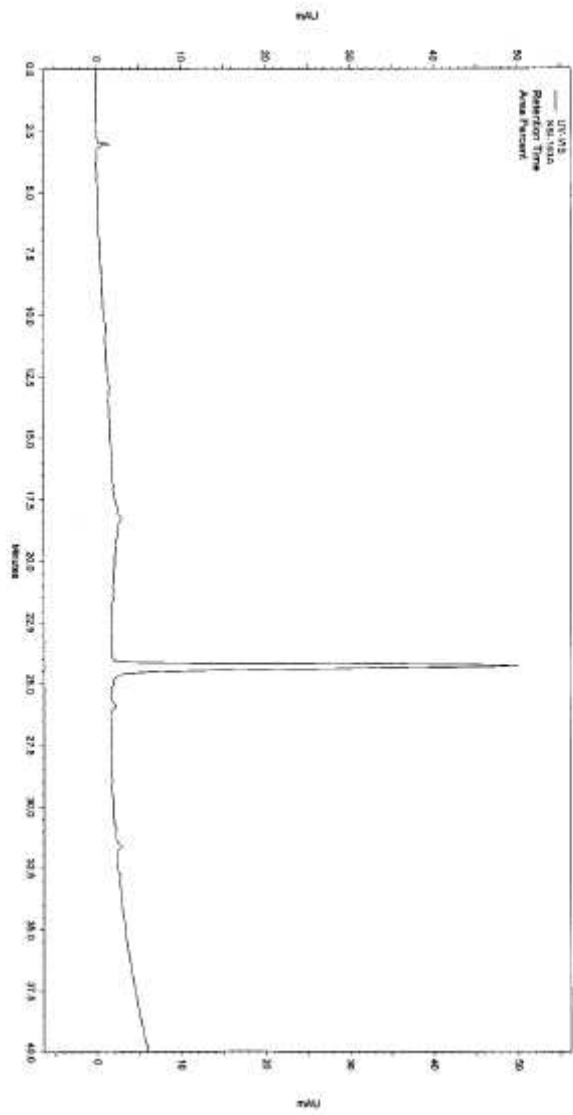

Supplement: NIHMS306410-supplement-1_si_001.pdf [file NIHMS306410-supplement-1_si_001.pdf]
